# Supplementary material
Source: publisher site journal article supplement (https://www.spandidos-publications.com/2425/downloadSupplementary)
Supplement: Supplementary file 1 [file downloadSupplementary]

## Sheet: GO
Table SV. GO Analysis of Proteins between GEO and control group.
Term Type	GO Term	GO ID	GEO num	GEO percent
cellular_component	cell part	GO:0044464	45	45/45
cellular_component	cell	GO:0005623	45	45/45
biological_process	cellular process	GO:0009987	43	43/45
cellular_component	organelle	GO:0043226	43	43/45
biological_process	single-organism process	GO:0044699	42	42/45
molecular_function	binding	GO:0005488	40	40/45
biological_process	biological regulation	GO:0065007	37	37/45
biological_process	metabolic process	GO:0008152	36	36/45
cellular_component	organelle part	GO:0044422	36	36/45
cellular_component	membrane	GO:0016020	36	36/45
biological_process	regulation of biological process	GO:0050789	35	35/45
biological_process	response to stimulus	GO:0050896	30	30/45
biological_process	localization	GO:0051179	29	29/45
cellular_component	macromolecular complex	GO:0032991	28	28/45
biological_process	cellular component organization or biogenesis	GO:0071840	26	26/45
cellular_component	membrane-enclosed lumen	GO:0031974	25	25/45
cellular_component	membrane part	GO:0044425	24	24/45
molecular_function	catalytic activity	GO:0003824	23	23/45
biological_process	signaling	GO:0023052	22	22/45
biological_process	positive regulation of biological process	GO:0048518	22	22/45
biological_process	negative regulation of biological process	GO:0048519	21	21/45
cellular_component	extracellular region	GO:0005576	20	20/45
biological_process	multicellular organismal process	GO:0032501	19	19/45
biological_process	developmental process	GO:0032502	18	18/45
cellular_component	extracellular region part	GO:0044421	18	18/45
biological_process	immune system process	GO:0002376	11	11/45
biological_process	multi-organism process	GO:0051704	10	10/45
biological_process	locomotion	GO:0040011	9	9/45
biological_process	biological adhesion	GO:0022610	8	8/45
molecular_function	structural molecule activity	GO:0005198	8	8/45
biological_process	growth	GO:0040007	6	6/45
cellular_component	cell junction	GO:0030054	6	6/45
cellular_component	supramolecular complex	GO:0099080	6	6/45
molecular_function	molecular function regulator	GO:0098772	6	6/45
molecular_function	transporter activity	GO:0005215	5	5/45
molecular_function	molecular transducer activity	GO:0060089	5	5/45
biological_process	reproduction	GO:0000003	4	4/45
biological_process	reproductive process	GO:0022414	4	4/45
cellular_component	synapse part	GO:0044456	4	4/45
cellular_component	synapse	GO:0045202	4	4/45
molecular_function	nucleic acid binding transcription factor activity	GO:0001071	4	4/45
molecular_function	signal transducer activity	GO:0004871	4	4/45
biological_process	behavior	GO:0007610	3	3/45
molecular_function	transcription factor activity, protein binding	GO:0000988	3	3/45
cellular_component	other organism	GO:0044215	2	2/45
cellular_component	other organism part	GO:0044217	2	2/45
molecular_function	electron carrier activity	GO:0009055	2	2/45
biological_process	cell killing	GO:0001906	1	1/45
biological_process	rhythmic process	GO:0048511	1	1/45
biological_process	detoxification	GO:0098754	1	1/45
biological_process	presynaptic process involved in chemical synaptic transmission	GO:0099531	1	1/45
molecular_function	translation regulator activity	GO:0045182	1	1/45
molecular_function	antioxidant activity	GO:0016209	1	1/45
